# Supplementary material
Source: PubMed Central journal article supplement (PMC3490597)

| <b>Supplemental Table S1. Primers and Probes</b> |                       |                           |
|--------------------------------------------------|-----------------------|---------------------------|
| Gene Name                                        | Primer names          | Sequences/coordinates     |
| Primers used in both qPCR and qRT-PCR            |                       |                           |
| psbA*                                            | psbA_qPCR_F1          | GTGGCTGCTCACGGTTATTT      |
|                                                  | psbA_qPCR_R1          | CCAAGCAGCCAAGAAGAAGT      |
| psbC*                                            | psbC_F1               | CCGACGGGTTTAGGTAAATATC    |
|                                                  | psbC_R1               | GAAGGTCCCAAAAACGCATA      |
| rpoB                                             | rpoB_F1               | CCGTTATAGCCCAACGCGAGGG    |
|                                                  | rpoB_R1               | CCCGCGGAACCCGAGGTTTT      |
| atpI*                                            | atpI_F1               | CCAACCCCAATCCTTTTACC      |
|                                                  | atpI_R1               | CGACTAATTCATCCGCCAAT      |
| atpH*                                            | atpH_F1               | CAGAAGCAGAAGGTAAAATAAGAGG |
|                                                  | atpH_R1               | TGCCACAACCAGTCCATAAA      |
| atpF*                                            | atpF_F1               | CTGGGAGTTTCGGGCTTAAT      |
|                                                  | atpF_R1               | AACTCGCACACACTCCCTTT      |
| atpA                                             | atpA_F1               | GCGAGGCTTACTTGGGTCGTGT    |
|                                                  | atpA_R1               | CTCGCTGACCGCGCCCTATG      |
| rps14**                                          | rps14_F1<br>(Bendich) | ATCTTGTTGCACCCGGTAAC      |
|                                                  | rps14_R2              | CCTACACGCCTTCATCGACGTT    |
| psaA*                                            | psaA_F1               | GGAAAATGCAGTCGGATGTT      |
|                                                  | psaA_R1               | AGAAATCTCGAAGCCAACCA      |
| ndhC                                             | ndhC_F1               | CGTCGAAACTCATTGCCCAAGGGT  |
|                                                  | ndhC_R1               | AGCCCCGGTTAGTGAAGGACCA    |
| atpB*                                            | atpB_F1               | GGGTTGATGAGAGGAATGGA      |

|        |          |                            |
|--------|----------|----------------------------|
|        | atpB_R1  | CGTTAAAAATTCGTCCGAGA       |
| rbcL   | rbcL_F1  | ACTCCTCAGCTCGGGGTCCG       |
|        | rbcL_R1  | TCCCCAGGAACGGGCTCGAT       |
| psaI*  | psaI_F1  | CTTACCCTCTATTTTCGTACCTTTAG |
|        | psaI_R1  | TGCACATAAAGAAATAAGGAAGTCA  |
| petA** | petA_F1  | TGGTTAAAGGAACAGATGATTCCG   |
|        | petA_R1  | AATGGCAATTGGCACATACA       |
| psaJ*  | psaJ_F1  | CACCCGTGCTAAGTACTCTATGG    |
|        | psaJ_R1  | GGAATGACAAAGCATCTGG        |
| clpP*  | clpP_F1  | TCGTTGCGAGATCACAAATC       |
|        | clpP_R1  | TGTCACCGTTTGCATCGTAT       |
| psbB   | psbB_F1  | TGCGCGGCGTGCTCAATTAG       |
|        | psbB_R1  | CGGAACAAGGTTGAGCGCCA       |
| psbH*  | psbH_F1  | TCGGAATATGGGAAAGTTGC       |
|        | psbH_R1  | TATCGCGAATAAAGCCATTG       |
| petB*  | petB_F1  | TAATGACGGAGGCCAACTTT       |
|        | petB_R1  | CGCCTGTGACCCAAGTTAAT       |
| petD*  | petD_F1  | GGGAGTTAACAAAGAAACCTGACT   |
|        | petD_R1  | AATTATGTCCCATCCCTTTAGC     |
| rpl16* | rpl16_F1 | CCATCGACTATAACCCCAAAA      |
|        | rpl16_R1 | CATATTTTTCCACCACGACG       |
| psaC   | psaC_F1  | CTGCGGGTTGTTTCAGGCCCT      |
|        | psaC_R1  | TTGTGTACGAGCTTGCCCAACA     |

|                                                                                  |                                |                                                       |
|----------------------------------------------------------------------------------|--------------------------------|-------------------------------------------------------|
|                                                                                  |                                |                                                       |
| ndhE*                                                                            | ndhE_F1<br>ndHE_R1             | GATCACAAGCCGAAACATGG<br>AAAAATTGCGAAAATGTCTCC         |
| ndhG*                                                                            | ndhG_F1<br>ndhG_R1             | ATTTGGGGGATTTGGTCTTC<br>CGAAAAGGCAGAATAAATTGG         |
| ndhI*                                                                            | ndhI_F1<br>ndhI_R1             | CAATTACATCGGAGCGTTTC<br>GCATACGCGAACACATACTTC         |
| ndhA*                                                                            | ndhA_F1<br>ndhA_R1             | TGGTCTTCTCATGGCAGGAT<br>TTGCTAGTACACAAAAAGTTAATGGT    |
| HMG 1/2                                                                          | zmHMG_F4<br>zmHMG_R4           | GAGGTGTAGAGGATAAGGAGCGATA<br>TGACAGCAGCATATCATCTTGGCT |
| Primers used specifically for qPCR (includes sequence in both exons and introns) |                                |                                                       |
| psbC**                                                                           | psbC_F1<br>psbC_R1             | CTACCACGTGGAAACGCTCT<br>ATACGATTAATCCGGCATGG          |
| atpF                                                                             | atpF_F2<br>atpF_R2             | AGCGGGAGAGCCAAATGAATCGA<br>AGGGTCCCTTTACGCAATTCTTCCG  |
| ycf3-int2                                                                        | ycf3-int2_F2<br>ycf3-int2-R2   | TCCTGGAGTAAGCGCTATAGCTTGT<br>AGCAATTTCTGAGCCGTATGAGGT |
| petD                                                                             | petD_F2<br>petD_R2             | TGTCCGGTTCCTTTGGGGGATGG<br>AAAGATCGTTGGGCCACGCGG      |
| rps12-int1                                                                       | rps12-int1_F2<br>rps12-int1_R2 | TGGATTTGCACCAAAGGAAACCA<br>GCCGCGCTTAAGGGATGTCC       |
| rpl2                                                                             | rpl2_F2                        | TCAATGGGAAATGCCCTACCTTTG                              |

|                              |          |                           |
|------------------------------|----------|---------------------------|
|                              | rpl2_R2  | TGAACTCAATCACTTGCTGCCGT   |
| ndhA                         | ndhA_F2  | AGGCTGACGCCAAAGATTCCATCC  |
|                              | ndhA_R2  | AGAGGAGCCGTATGAAGCTAAGGTT |
| psbC***                      | psbC-F   | TAATGTAGGGTCTGCCCAAGG     |
|                              | psbC-R   | TTCTAACCACGGAGCACGAAG     |
| ndhA***                      | ndhA-F   | GATAACATCACAGTTCCCACCG    |
|                              | ndhA-R   | GATACCGAAACGAAACAATCCT    |
| cox2**<br>(mitochondria)     | cox2_F2  | ACAGCAGTGGCATACTTTGG      |
|                              | cox2_R2  | AAGGAGGAGCAGGAACAACAGG    |
| ccmfc**<br>(mitochondria)    | ccmfc_F2 | TCAGCGAAGCGTGAGCGG        |
|                              | ccmfc_R2 | AACAAGCACCCTCGACGAGG      |
| nad4**<br>(mitochondria)     | nad4_F2  | GCAAAAAGTCCTTCCACGGCA     |
|                              | nad4_R1  | AGCAAGCGTAGGCAACCAAAC     |
| atp6<br>(mitochondria)***    | atp6-F   | TGCTACTCACTCTCGGTTTGG     |
|                              | atp6-R   | CGGCACGAAATCATAAATAAGC    |
| rps12<br>(mitochondria)***   | rps12-F  | ATTATGACCTTCGCCTGGAATG    |
|                              | rps12-R  | GGAGTATGCCTGCGTGTTTC      |
| 18S***                       | 18S-F    | CAACCATAAACGATGCCGAC      |
|                              | 18S-R    | TTTCAGCCTTGCGACCATAC      |
|                              |          |                           |
| Primers used only in qRT-PCR |          |                           |
| psaB                         | psaB_F1  | GGACCCCACTACTCGTCGTA      |
|                              | psaB_R1  | ATCCGGACGTCCATAGAAAGA     |

|                                                          |                              |                                                                                                                   |
|----------------------------------------------------------|------------------------------|-------------------------------------------------------------------------------------------------------------------|
|                                                          |                              |                                                                                                                   |
| psbE                                                     | psbE_F1<br>psbE_R1           | CTATTCATTGCGGGTTGGTT<br>GAATTCCTTGTCGGCTTTCC                                                                      |
| rpoA                                                     | rpoA_F1<br>rpoA_R1           | CCACCCCTTTTAACCTTTCA<br>TTGGCCCTTTTGAGACAATTA                                                                     |
| Primers used for <i>w2</i> transcript qRT-PCR            |                              |                                                                                                                   |
| Primer set 1                                             | DU_Pol_F2<br>DU_Pol_R2       | GTCCTTGGAATTC AAGACAACCG<br>ACCATTACTATTGCCGGCTTTGCT                                                              |
| Primer set 2                                             | DU_Pol_F3<br>DU_Pol_R3       | TCATGCATGTGACACAGAGGTAGC<br>TCCACCCAAATGCATGTCTTGCCA                                                              |
| Primer set 3                                             | DU_Pol_F5<br>DU_Pol_R5       | GCTGATGTGTTGAGTTGCTGACCA<br>AAGACGCACAGTTCAACAGCAGA                                                               |
| Primers used for analysis of <i>w2-mum2</i> mis-splicing |                              |                                                                                                                   |
|                                                          | DU_Pol_F2<br>DNA_Pol_exon_R1 | GTCCTTGGAATTC AAGACAACCG<br>GCCTCAGCACCTTTAGTGCCAGA                                                               |
| Primers for genotyping <i>w2-mum1</i>                    |                              |                                                                                                                   |
| Amplifies WT allele                                      | tk8051_5'<br>tk8579_3'       | GGCCTTCAGAGTCTGCGGAG<br>AACATTGTTGCAGTGCCTGC                                                                      |
| Amplifies mutant allele                                  | tk8051_5'<br>Eomumix         | GGCCTTCAGAGTCTGCGGAG<br>CCCTAAGCTGCTTTACCTCCG<br>GCCTAAGCTGCTTTATCTCCG<br>(mix of two <i>Mu</i> specific primers) |
| Primers for genotyping <i>w2-mum2</i>                    |                              |                                                                                                                   |
| Amplifies WT allele                                      | tk1507pol15'                 | GCTGACGAGAGCAGGAGGTT                                                                                              |

|                                                                    |                              |                                                                                                                   |
|--------------------------------------------------------------------|------------------------------|-------------------------------------------------------------------------------------------------------------------|
| Amplifies WT allele                                                | tk1507pol15'<br>tk2203pol13' | GCTGACGAGAGCAGGAGGTT<br>CATTAGATTTAGGTAACAAGCCATGACCGA<br>(use this set to check for WT product)                  |
| Amplifies mutant allele                                            | tk1507pol15'<br>Eomumix      | GCTGACGAGAGCAGGAGGTT<br>CCCTAAGCTGCTTTACCTCCG<br>GCCTAAGCTGCTTTATCTCCG<br>(mix of two <i>Mu</i> specific primers) |
| Coordinates for probes used in RNA and DNA gel blot hybridizations |                              |                                                                                                                   |
| rps12 intron 1                                                     |                              | 68,793 – 69,302                                                                                                   |
| ycf3 intron 2                                                      |                              | 44,383 – 45,116                                                                                                   |
| psbA                                                               |                              | 295 – 1,074                                                                                                       |
| atpA                                                               |                              | 36,690 – 37,679                                                                                                   |
|                                                                    |                              |                                                                                                                   |
|                                                                    |                              |                                                                                                                   |
| psaB                                                               |                              | 40,716 – 41,052                                                                                                   |
| psaJ                                                               |                              | 66,399 – 66,673                                                                                                   |
| petB                                                               |                              | 73,971 – 74,538                                                                                                   |
| rpoB                                                               |                              | 23,258 – 24,475                                                                                                   |
| trnT-UGU                                                           |                              | 48,065 – 48,215                                                                                                   |
| trnG-UCC                                                           |                              | 13,248 – 14,013                                                                                                   |
| trnV-UAC                                                           |                              | 53,796 – 53,836                                                                                                   |
| rrn23                                                              |                              | 99,065 – 99,688                                                                                                   |
| mt-rps4                                                            |                              | 19,631 – 21,050 (mitochondrial genome)                                                                            |
| Primers used to                                                    |                              | CCAATAGCGTATATTTAAGTTGTTGC                                                                                        |

\*Sharpe RM, Dunn SN, Cahoon AB: **A plastome primer set for comprehensive quantitative real time RT-PCR analysis of *Zea mays*: a starter primer set for other *Poaceae* species.** *Plant Methods* 2008, **4**:14.

**\*\* Kumar RA, Bendich AJ: Distinguishing authentic mitochondrial and plastid DNAs from similar DNA sequences in the nucleus using the polymerase chain reaction.**  
*Current Genetics* 2011, **57**: 287-95.

**\*\*\*** Primers used in supplemental Figure S3

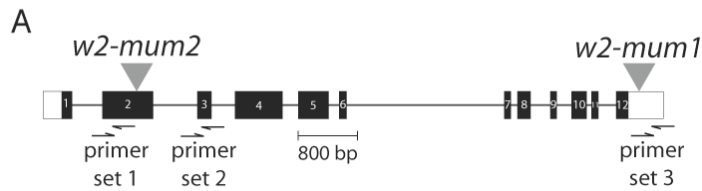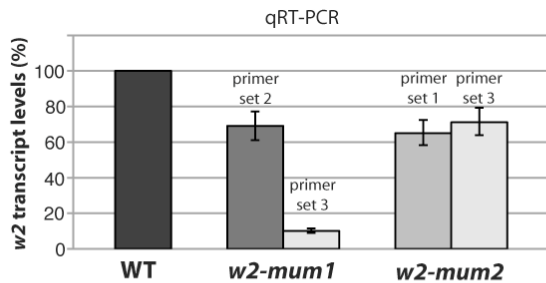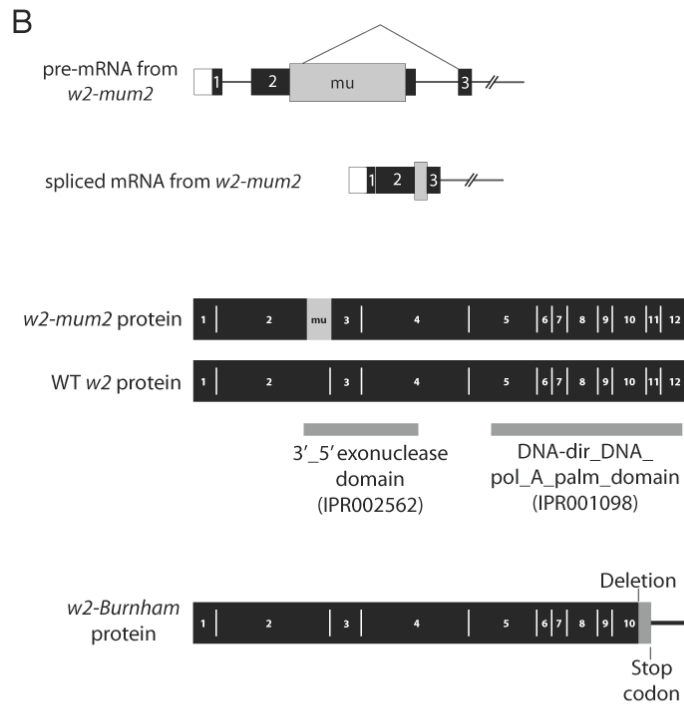

CCAAATATGGCTCATGCAACTTCTGGCCAAAGGG (Delete 1 bp) TCACATTGAGC  
 GTGCTGCTATCAATGCTCCTGTACAGGGCAGTGCAGCTGATGTTGCTATGTGTG  
 CAATGCTTGAGATAG  
 New stop codon

**Supplemental Figure S1.** Effects of *w2* mutations on *w2* gene expression. (A) qRT-PCR was performed with the primer sets diagrammed above. (B) Aberrant proteins produced by the *w2-mum2* and *w2-Burnham* alleles. RT-PCR followed by DNA sequencing revealed the diagrammed mis-splicing event for *w2-mum2*: the RNA lacks 52 codons from exon 2, and these are replaced by 47 codons from the *Mu* terminal inverted repeat. This insertion/deletion maps to the conserved 3'→5' exonuclease domain of DNA polymerase I. End-point PCR and RT-PCR of *w2-Burnham* material detected a 1-bp deletion in exon 10. The gray box represents amino acids that are translated out of frame. The sequence context of the deletion is shown below; the italicized nucleotides are translated out of frame until termination at an in-frame stop codon.



**Supplemental Figure S2.** Additional qPCR assays of plastid DNA content in wild-type and *w2* basal, middle, and apical leaf sections. Genes are listed according to their order in the plastid genome. LSC- large single copy region; IR- inverted repeat; SSC- small single copy region.

(A) Ratio of plastid-to-nuclear DNA copy number in wild-type (WT) leaf sections. Values are plotted relative to the ratio in the apical leaf section.

(B) Ratio of plastid-to-nuclear DNA copy number in *w2* mutants. Values are expressed as a percent of the ratio in the corresponding wild-type tissue.

Supplementary Figure S2

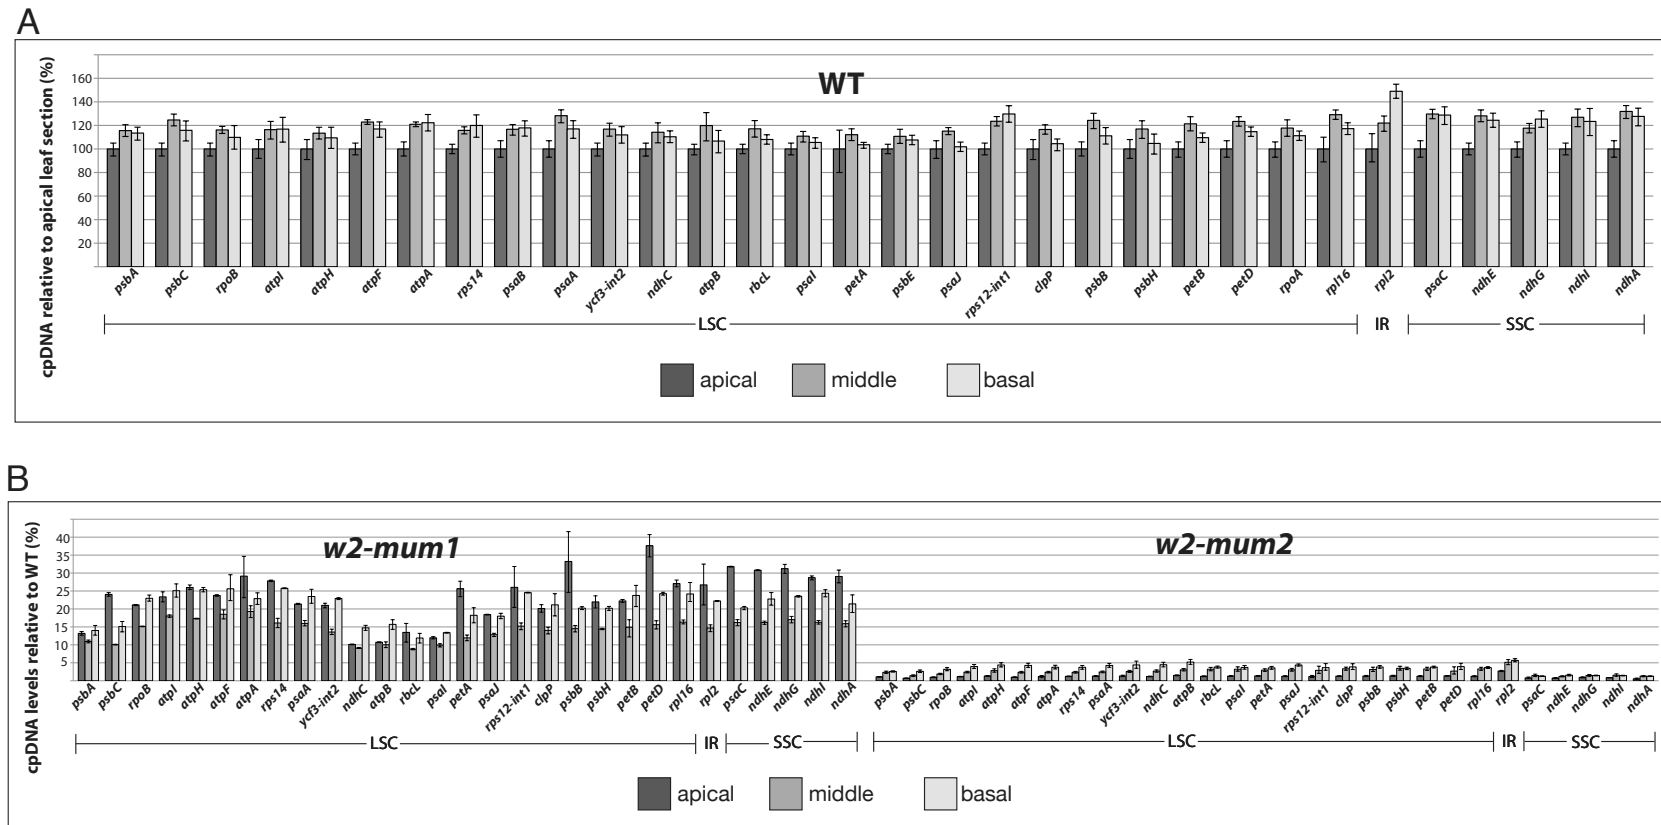

**Supplemental Figure S3.** qPCR survey of chloroplast and mitochondrial DNA levels in independently-arising albino mutants in the PML mutant collection. The chloroplast *psbC* and *ndhA* genes and the mitochondrial *rps12* and *atp6* genes were assayed by qPCR, and normalized to the nuclear 18S rRNA gene. The cpDNA and mtDNA values indicated are the mean of the results obtained with the respective amplicons. Results for the *w2*-Burnham allele are marked. The causal nuclear mutations in most of these mutants are not known. The mutants were ordered according to their content of plastid DNA.

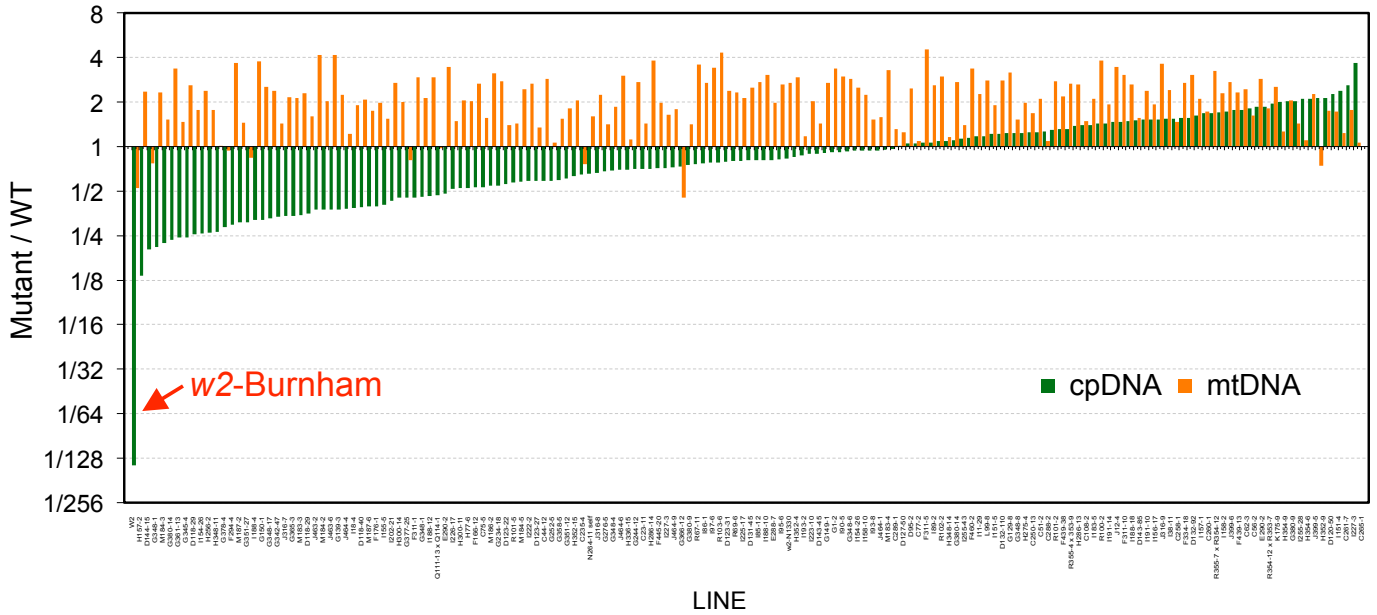

Supplement: supp_pp.112.204198_204198Supplemental_Information.pdf [file supp_pp.112.204198_204198Supplemental_Information.pdf]
